# Supplementary material for: SNHG22 overexpression indicates poor prognosis and induces chemotherapy resistance via the miR-2467/Gal-1 signaling pathway in epithelial ovarian carcinoma
Source: publisher site journal article supplement (doi:10.18632/aging.102313), 2019-10-03
Supplement: Supplementary file [file aging-v11i19-102313-supplementary-material-SD2.pdf]

## SUPPLEMENTARY TABLES

**Supplementary Table 1. The primers used in this study.**

| <b>Gene</b> | <b>Forward primer (5'-3')</b> | <b>Reverse primer(5'-3')</b> |
|-------------|-------------------------------|------------------------------|
| SNHG22      | AGGAGAGCTGCTCTTCACAGG         | TCCTAGGCTGAGTGTGTCTCC        |
| Gal-1       | CTCCTGACGCTAAGAGCTTCG         | CCAGGCTGGAAGGGAAAGAC         |
| GAPDH       | CCTGGCACCCAGCACAAAT           | GGGCCGGACTCGTCATCG           |

**Supplementary Table 2. The antibodies used in this study.**

| <b>Antibody</b>                       | <b>Company</b> | <b>Cat No.</b> |
|---------------------------------------|----------------|----------------|
| Gal-1                                 | Abcam          | ab138513       |
| GAPDH                                 | Abcam          | ab181602       |
| HRP-labeled Goat Anti-Rabbit IgG(H+L) | Beyotime       | A0208          |
| HRP-labeled Goat Anti-mouse IgG(H+L)  | Beyotime       | A0216          |
| AGO2                                  | Abcam          | ab32381        |
| IgG                                   | Abcam          | ab172730       |

**Supplementary Table 3. The target sequences of shRNAs for SNHG22.**

| <b>shRNA</b>    | <b>Target sequence</b> |
|-----------------|------------------------|
| SNHG22 shRNA -1 | GTGGGCAAGTGAGATTATC    |
| SNHG22 shRNA -2 | GGTCTCCTGTGAACCCTGA    |
| SNHG22 shRNA -3 | GATCAGCCTGTTGACAGGA    |
